# Supplementary material for: Unveiling ultraviolet photodissociation dynamics of SiO from a laser-ablated supersonic beam with time-sliced ion velocity imaging
Source: Royal Society of Chemistry journal article supplement (doi:10.1039/d4cp03843f), 2024-11-25
Supplement: d4cp03843f1.pdf [file d4cp03843f1.pdf]

## Supplementary Information for

### **Unveiling Ultraviolet Photodissociation Dynamics of SiO from Laser- Ablated Supersonic Beam with Time-Sliced Ion Velocity Imaging**

Yujie Ma, Fangfang Li, Dong Yan, Ang Xu, Ti Zhou, Jiaxing Liu, Fengyan Wang\*

Department of Chemistry and Shanghai Key Laboratory of Molecular Catalysis and

Innovative Materials, Collaborative Innovation Centre of Chemistry for Energy

Materials (iChEM), Fudan University, Shanghai, 200438, China

\*Corresponding Author: [fengyanwang@fudan.edu.cn](mailto:fengyanwang@fudan.edu.cn)

Fig. S1-S4

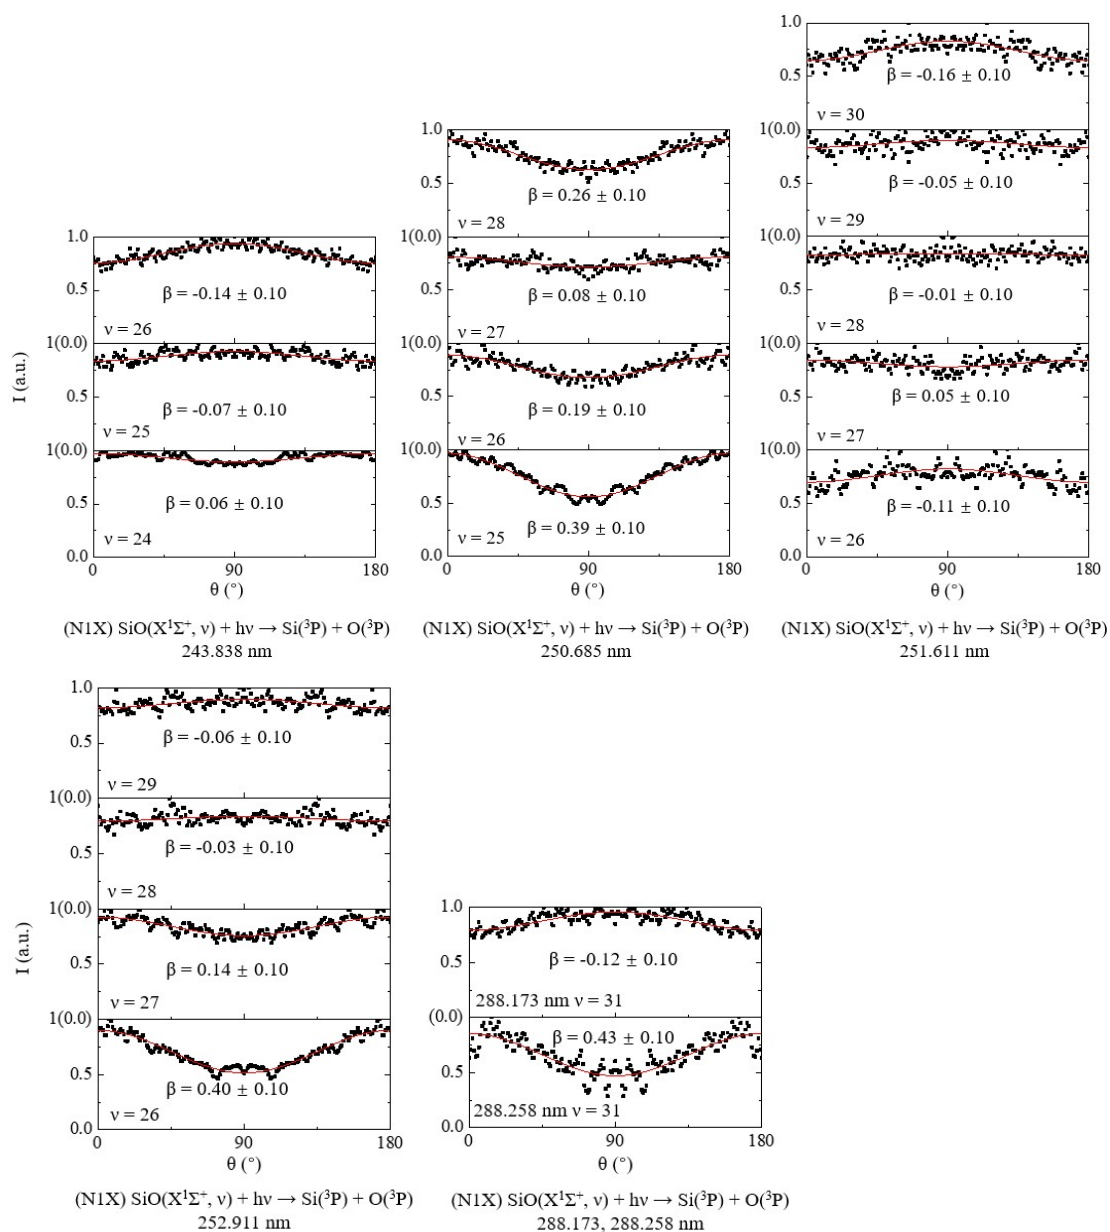

Fig. S1 Angular distributions of Si products in  $\text{SiO}(X^1\Sigma^+, v = 24-31) + h\nu \rightarrow \text{Si}(^3\text{P}) + \text{O}(^3\text{P})$  (N1X) channel from one-photon dissociation of  $\text{SiO}(X^1\Sigma^+, v)$  at 243.838, 250.685, 251.611, 252.911, 288.173 and 288.258 nm, respectively. Further details regarding the fit can be found in the paper.

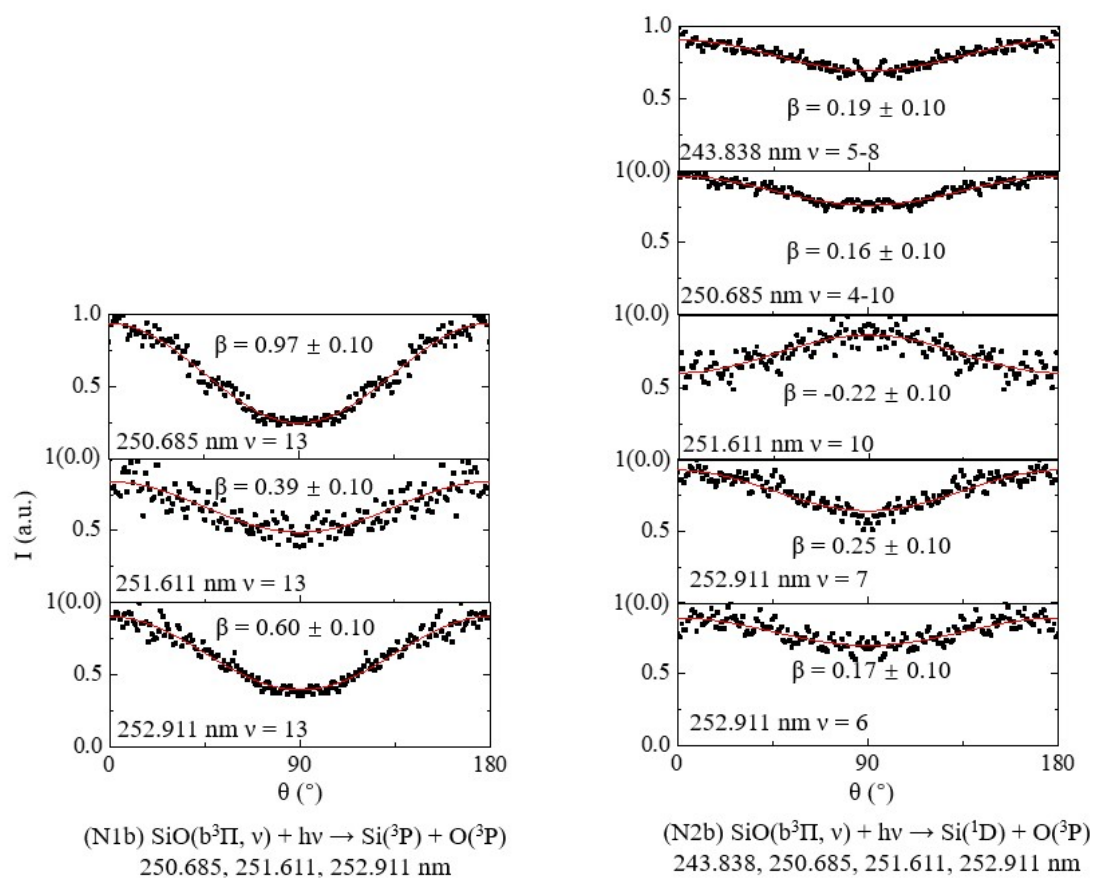

Fig. S2 Angular distributions of Si products in  $\text{SiO}(\text{b}^3\Pi, \nu) + h\nu \rightarrow \text{Si}(\text{}^3\text{P}) + \text{O}(\text{}^3\text{P})$  (N1b) channel and  $\text{SiO}(\text{b}^3\Pi, \nu) + h\nu \rightarrow \text{Si}(\text{}^1\text{D}) + \text{O}(\text{}^3\text{P})$  (N2b) channel from one-photon dissociation of  $\text{SiO}(\text{b}^3\Pi, \nu)$  at 252.911, 250.685, 251.611, 243.838 nm, respectively.

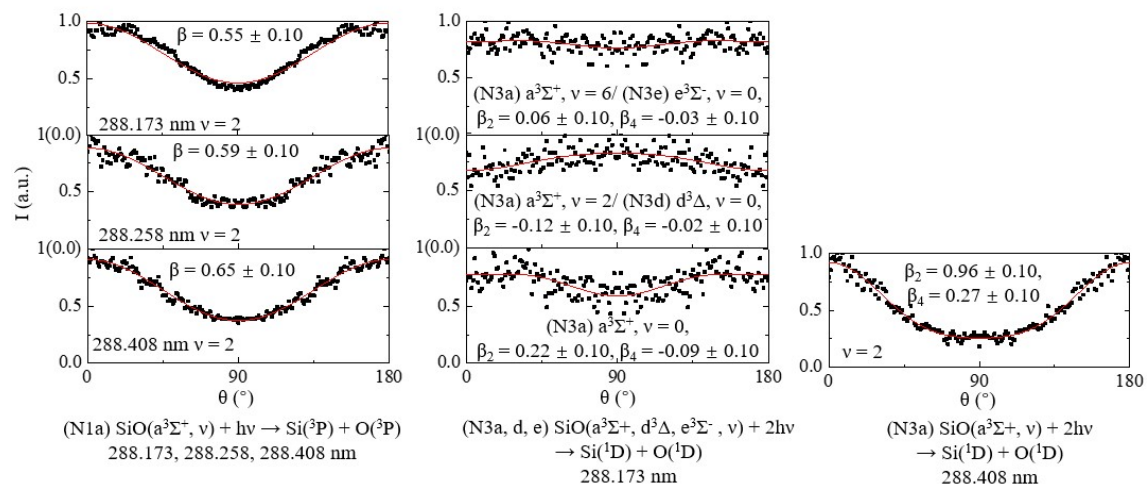

Fig. S3 Angular distributions of Si products from one-photon and two-photon dissociation of  $\text{SiO}(a^3\Sigma^+, d^3\Delta$  or  $e^3\Sigma^-, v)$  at 288.173, 288.258 and 288.408 nm, respectively.

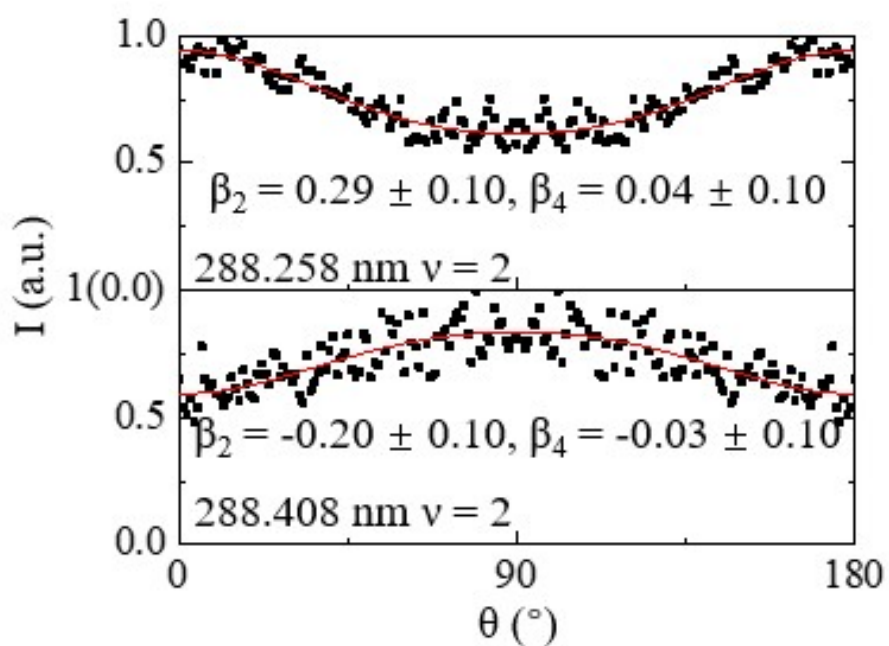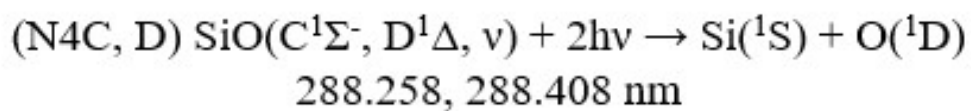

Fig. S4 Angular distributions of Si products from two-photon dissociation of  $\text{SiO}(\text{C}^1\Sigma^-$ ;  $\text{D}^1\Delta, v)$ , respectively.
